# Supplementary material for: Understanding the molecular mechanism of pulse current charging for stable lithium-metal batteries
Source: PubMed Central journal article supplement — Sci Adv. 2017 Jul 21;3(7):e1701246. doi: 10.1126/sciadv.1701246 (PMC5521994; doi:10.1126/sciadv.1701246), 2017-07-21
Supplement: 1701246_SM.pdf [file 1701246_SM.pdf]

## Supplementary Materials for

### Understanding the molecular mechanism of pulse current charging for stable lithium-metal batteries

Qi Li, Shen Tan, Linlin Li, Yingying Lu, Yi He

Published 21 July 2017, *Sci. Adv.* **3**, e1701246 (2017)

DOI: 10.1126/sciadv.1701246

#### **This PDF file includes:**

- fig. S1. The impact of pulsed electric fields on the diffusivity of  $\text{Li}^+$ .
- fig. S2. Surface and cross-section SEM images of Li-metal electrodes cycled with or without pulse current.
- fig. S3. Cell lifetime at various  $T_{\text{on}}$  with fixed frequencies.
- fig. S4. Voltage-time profiles of cells cycled with pulse current at fixed  $T_{\text{on}} = 1$  s.
- fig. S5. Voltage-time profiles of cells cycled with pulse current at fixed  $T_{\text{on}}/T_{\text{off}} = 1:5$ .

## SUPPLEMENTARY MATERIALS

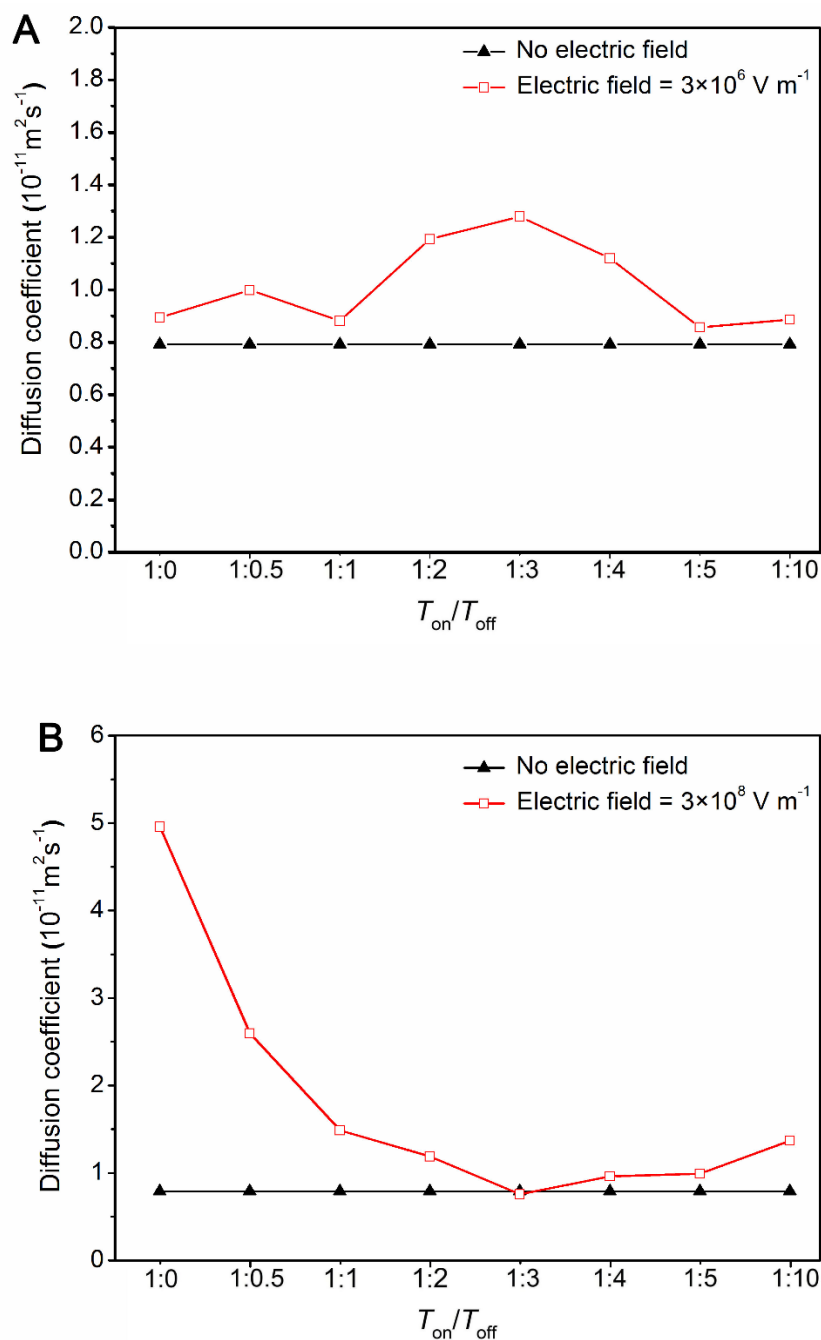

**fig. S1. The impact of pulsed electric fields on the diffusivity of  $\text{Li}^+$ .** (A) Diffusion coefficients of  $\text{Li}^+$  in 1M LiTFSI/PC solutions under a static electric field with a strength of  $3 \times 10^6 \text{ V m}^{-1}$ , under a pulsed electric field with the same strength, and with no electric field. (B) Diffusion coefficients of  $\text{Li}^+$  in 1M LiTFSI/PC solutions under a static electric field with a strength of  $3 \times 10^8 \text{ V m}^{-1}$ , under a pulsed electric

field with the same strength, and with no electric field. The  $T_{\text{on}}/T_{\text{off}}$  ratios of pulsed electric fields are 1:0.5, 1:1, 1:2, 1:3, 1:4, 1:5, and 1:10. For convenience, a static electric field is shown as the one with a  $T_{\text{on}}/T_{\text{off}}$  ratio of 1:0. The diffusion coefficient of  $\text{Li}^+$  is shown to be sensitive to the  $T_{\text{on}}/T_{\text{off}}$  ratio of the pulsed electric field with an optimal value at 1:3 in (A).

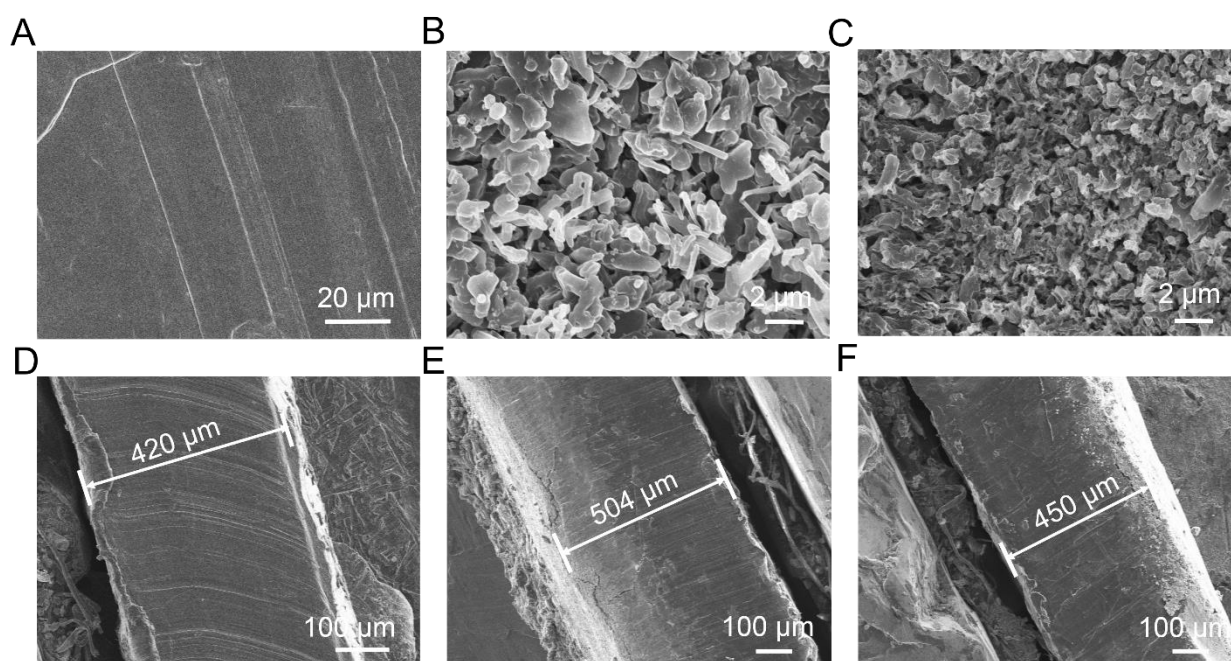

**fig. S2. Surface and cross-section SEM images of Li-metal electrodes cycled with or without pulse current.** Surface (A) and cross-section (D) SEM images of pristine Li-metal electrode. Surface (B) and cross-section (E) SEM images of Li-metal electrode from cells with constant current cycling. Surface (C) and cross-section (F) SEM images of Li-metal electrode from cells with pulse current cycling ( $T_{\text{on}}/T_{\text{off}}=1:5, T_{\text{on}}=1\text{ s}$ ). The electrodes were obtained from the Li/Li symmetrical cells before cycling and after being cycled for 8 times at current density of  $3\text{ mA cm}^{-2}$  with a total capacity of  $1\text{ mAh cm}^{-2}$  for each half cycle.

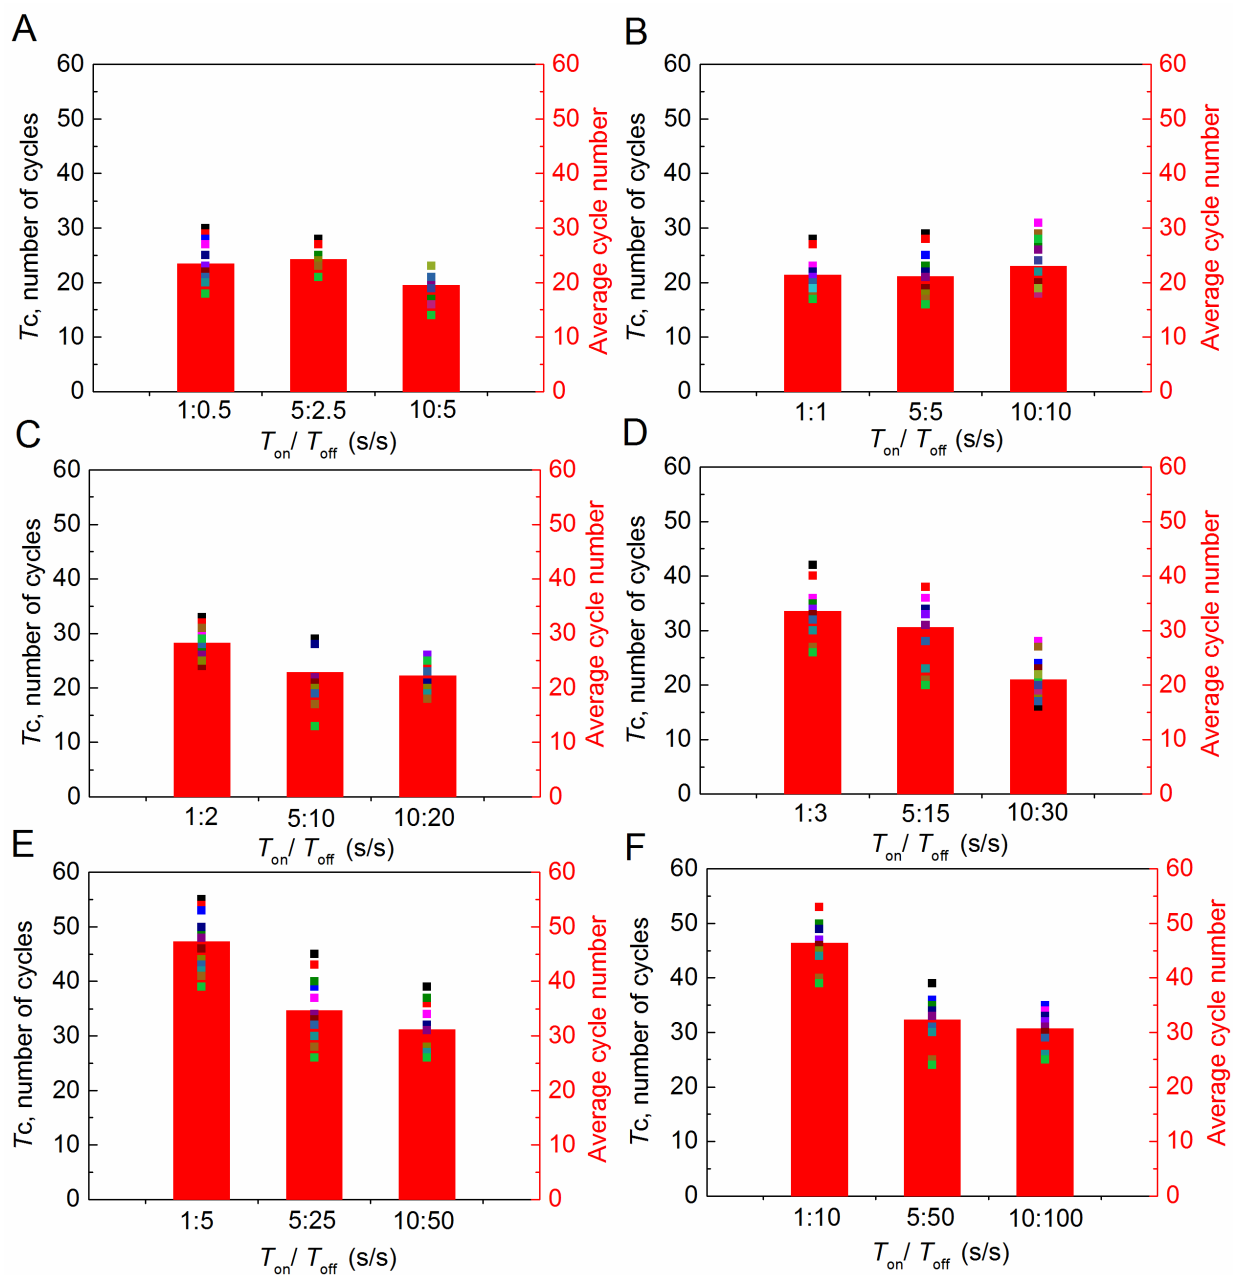

**fig. S3. Cell lifetime at various  $T_{on}$  with fixed frequencies.** Li/Li symmetrical cells were cycled with pulse current at fixed current density of  $3 \text{ mA cm}^{-2}$ . Cell lifetime at  $T_{on}/T_{off} = 1:0.5$  (A), 1:1 (B), 1:2 (C), 1:3 (D), 1:5 (E), and 1:10 (F). Red columns show their average cell lifetime calculated from the measured 14 samples at each condition.

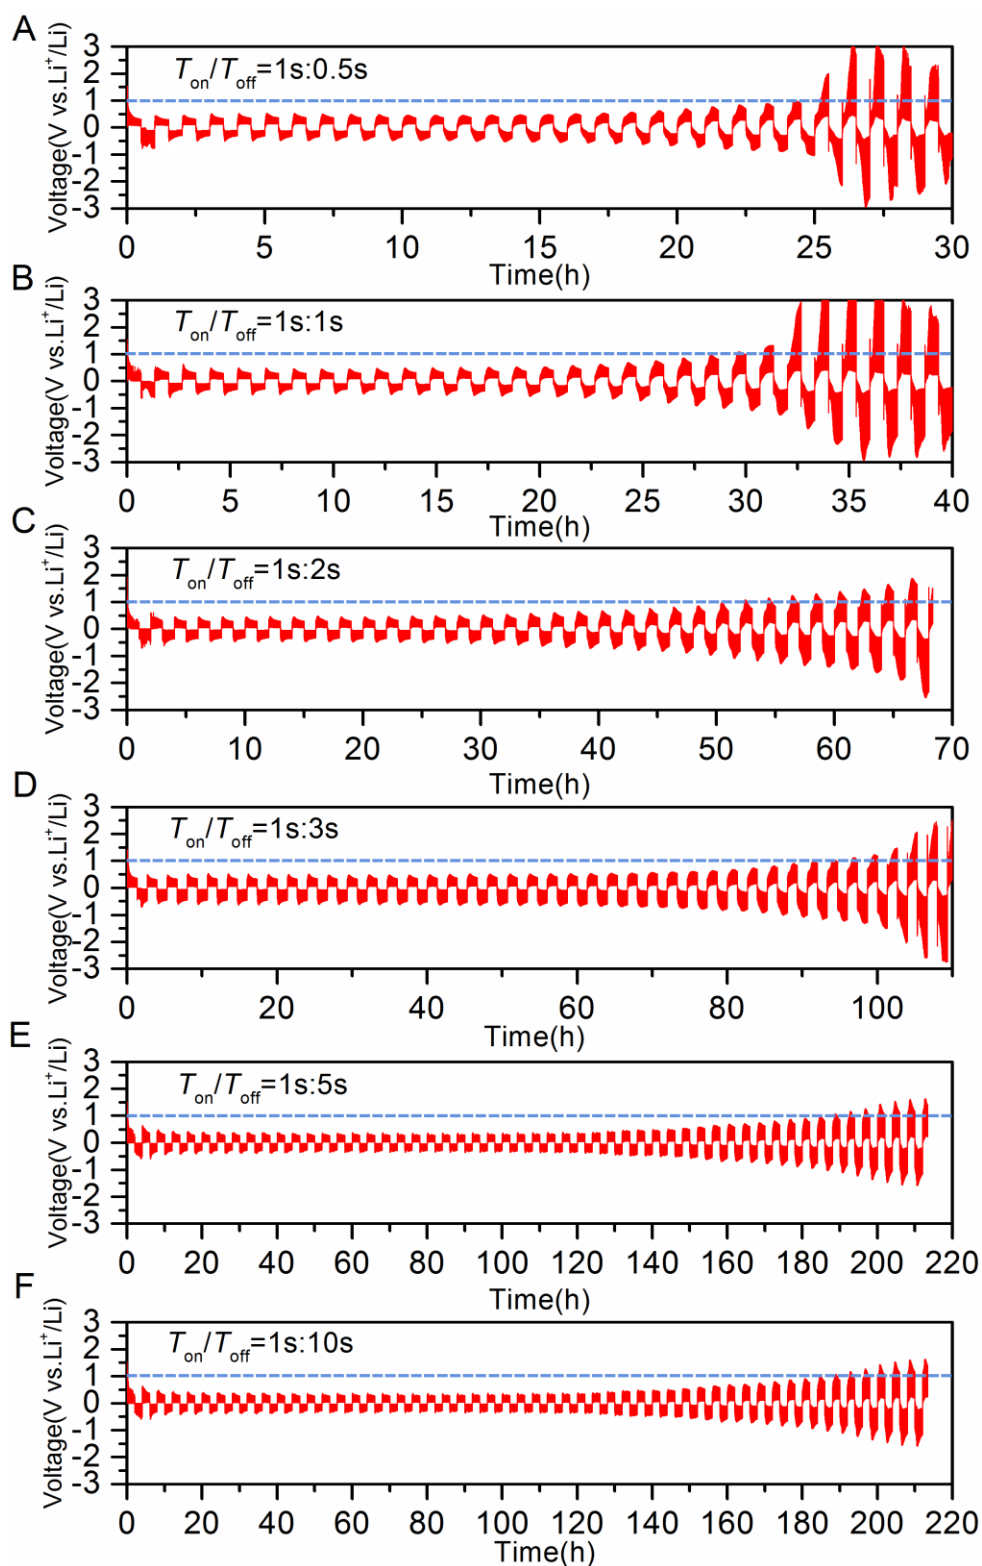

**fig. S4. Voltage-time profiles of cells cycled with pulse current at fixed  $T_{on} = 1$  s.** Li/Li symmetrical cells were cycled at a fixed current density of  $3 \text{ mA cm}^{-2}$  at  $T_{on}/T_{off} = 1:0.5$  (A), 1:1 (B), 1:2 (C), 1:3 (D), 1:5 (E), and 1:10 (F).

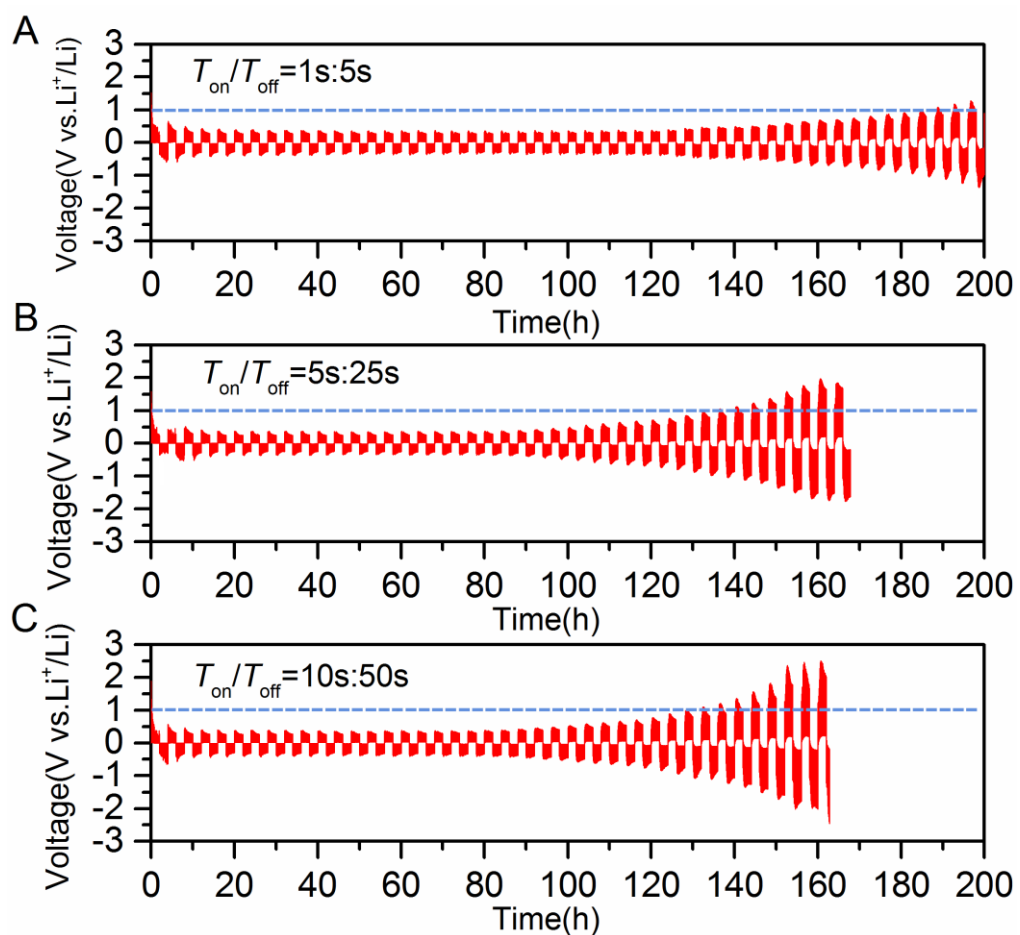

**fig. S5. Voltage-time profiles of cells cycled with pulse current at fixed  $T_{\text{on}}/T_{\text{off}} = 1:5$ . Li/Li** symmetrical cells were cycled with pulsed current at a fixed current density of  $3 \text{ mA cm}^{-2}$  at  $T_{\text{on}} = 1 \text{ s}$  (**A**),  $5 \text{ s}$  (**B**),  $10 \text{ s}$  (**C**).
